# Supplementary figures and images for: Autism and attention‐deficit/hyperactivity disorder in children with cerebral palsy: high prevalence rates in a population‐based study
Source: PubMed Central journal article supplement — Dev Med Child Neurol. 2020 Nov 18;63(3):320–7. doi: 10.1111/dmcn.14736 (PMC7894137; doi:10.1111/dmcn.14736), 2020-11-18

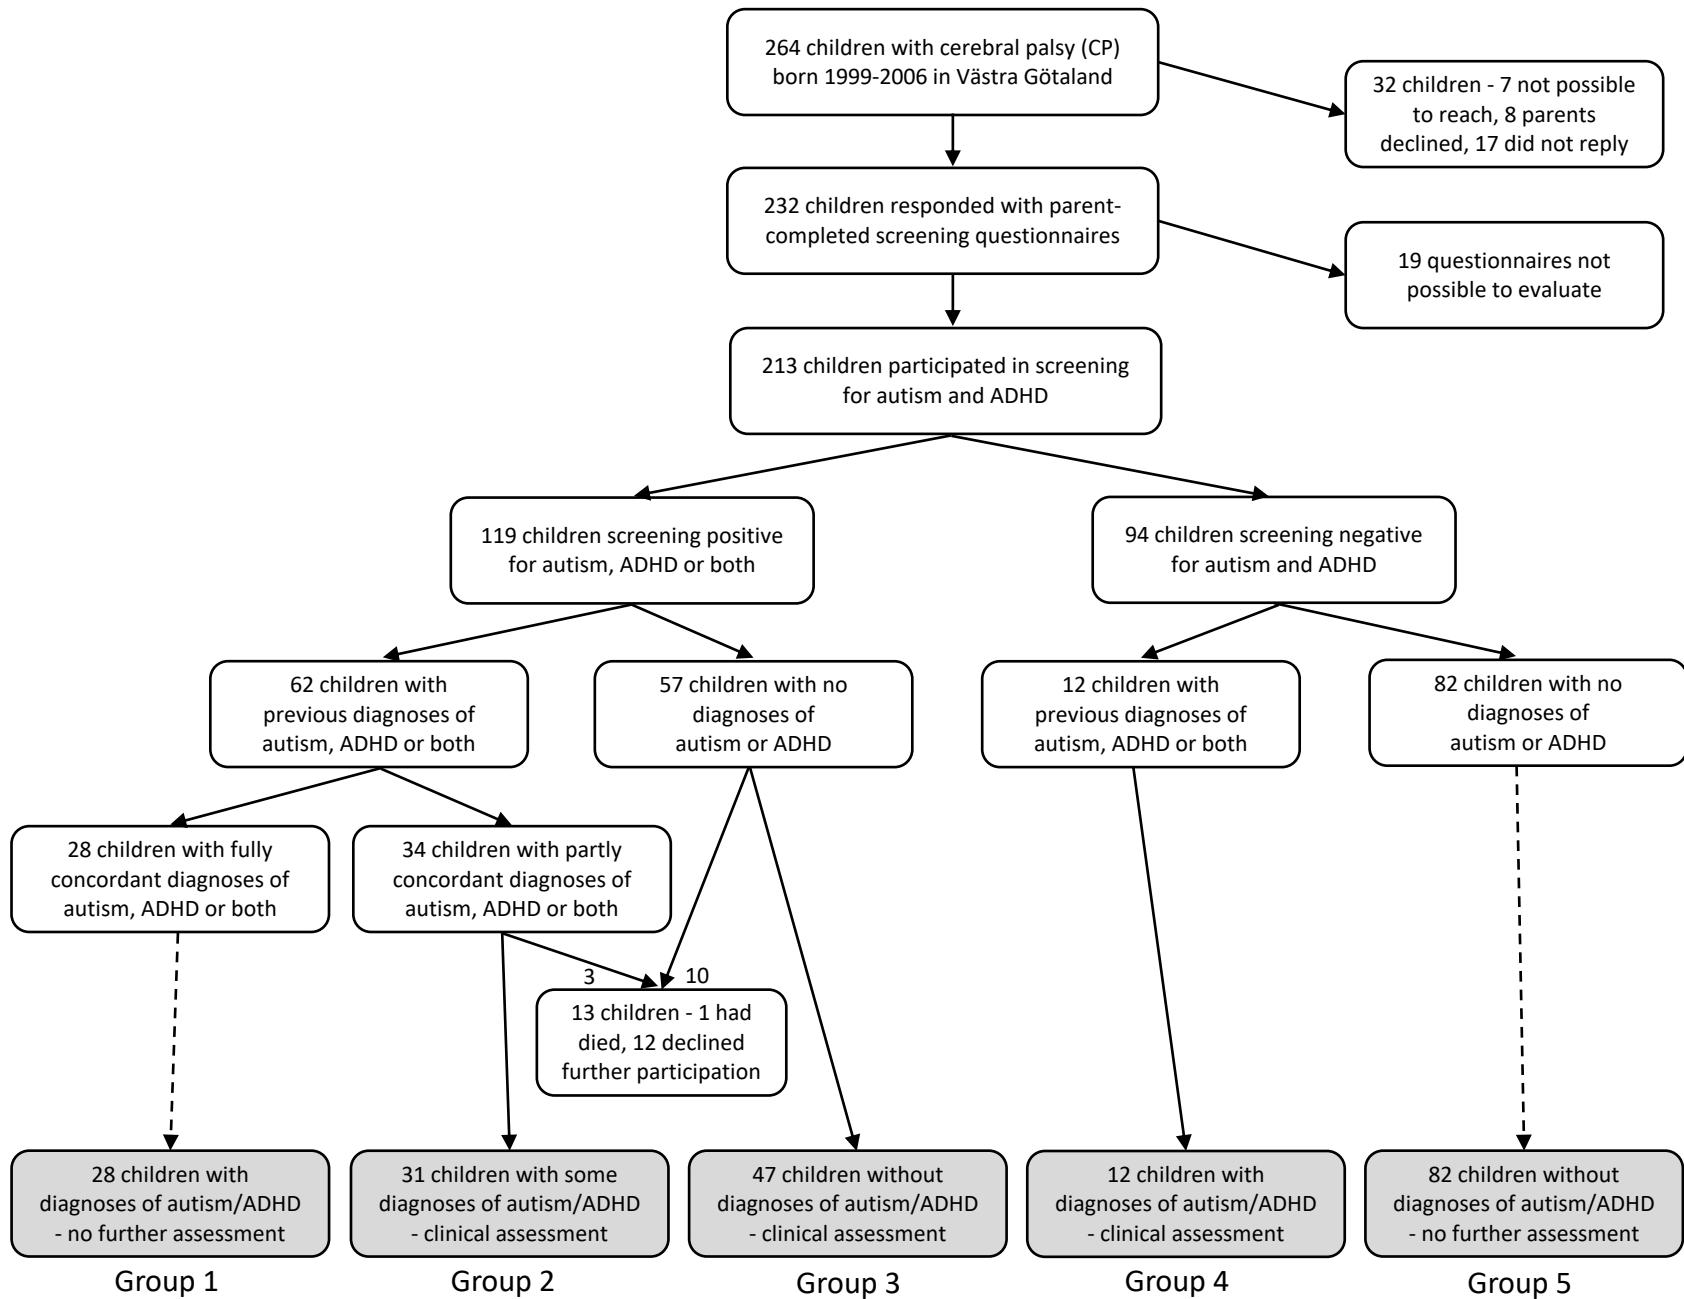

Supplement: DMCN-63-320-s001.pdf [file DMCN-63-320-s001.pdf]
